# Supplementary material for: The Effect of Acceptor Structure on Emission Color Tuning in Organic Semiconductors with D–π–A–π–D Structures
Source: MDPI journal article supplement (doi:10.3390/nano9081179), 2019-08-17
Supplement: s1 [file s1]

## *Electronic Supplementary Information (ESI)*

# **The effect of acceptor structure on emission colour tuning in organic semiconductors with D- $\pi$ -A- $\pi$ -D structures**

Przemyslaw Ledwon<sup>1,\*</sup>, Gabriela Wiosna-Salyga<sup>2,\*</sup>, Marian Chapran<sup>2</sup> and Radoslaw Motyka<sup>1</sup>

<sup>1</sup> Silesian University of Technology, Faculty of Chemistry, Strzody 9, 44-100 Gliwice, Poland;

<sup>2</sup> Department of Molecular Physics, Lodz University of Technology, Zeromskiego 116, 90-924 Lodz, Poland;

\* Correspondence: [przemyslaw.ledwon@polsl.pl](mailto:przemyslaw.ledwon@polsl.pl); Tel.: +48-32-237-1305 (P.L.); [gabriela.wiosna-salyga@p.lodz.pl](mailto:gabriela.wiosna-salyga@p.lodz.pl); Tel.: +48 42-631-3205 (G.W.-S.)

### **Table of content**

|                                                                                                                                                                          |        |
|--------------------------------------------------------------------------------------------------------------------------------------------------------------------------|--------|
| Figure S1-S13: <sup>13</sup> C-NMR and <sup>1</sup> H-NMR spectra                                                                                                        | p. 2-9 |
| Figure S16. UV-Vis and photoluminescence spectra spectra of studied compounds, measured in different solvents                                                            | p.10   |
| Figure S17. Photoluminescence spectra of emitters in the different solvents, 1 wt% in zeonex matrix and in pristine films                                                | p. 11  |
| Figure S18. Photoluminescence decay curves of studied compounds in the different solutions (10 <sup>-5</sup> M in toluene, chloroform, THF, DCM) at the maximum emission | p. 12  |
| Table S1. The fluorescence lifetime of the red emitters in diluted solutions obtained from photoluminescence decay curves at the maximum emission                        | p.12   |
| Figure S19. Normalized absorption spectra of the emitters in toluene solution and photoluminescence spectrum of PVK:PO-T2T in film                                       | p. 13  |
| Figure S20. Normalized photoluminescence spectra of thin layers: PVK:PO-T2T doped with 1, 2, 5, 8, 10 wt% of studied molecules.                                          | p. 14  |

## NMR Spectra

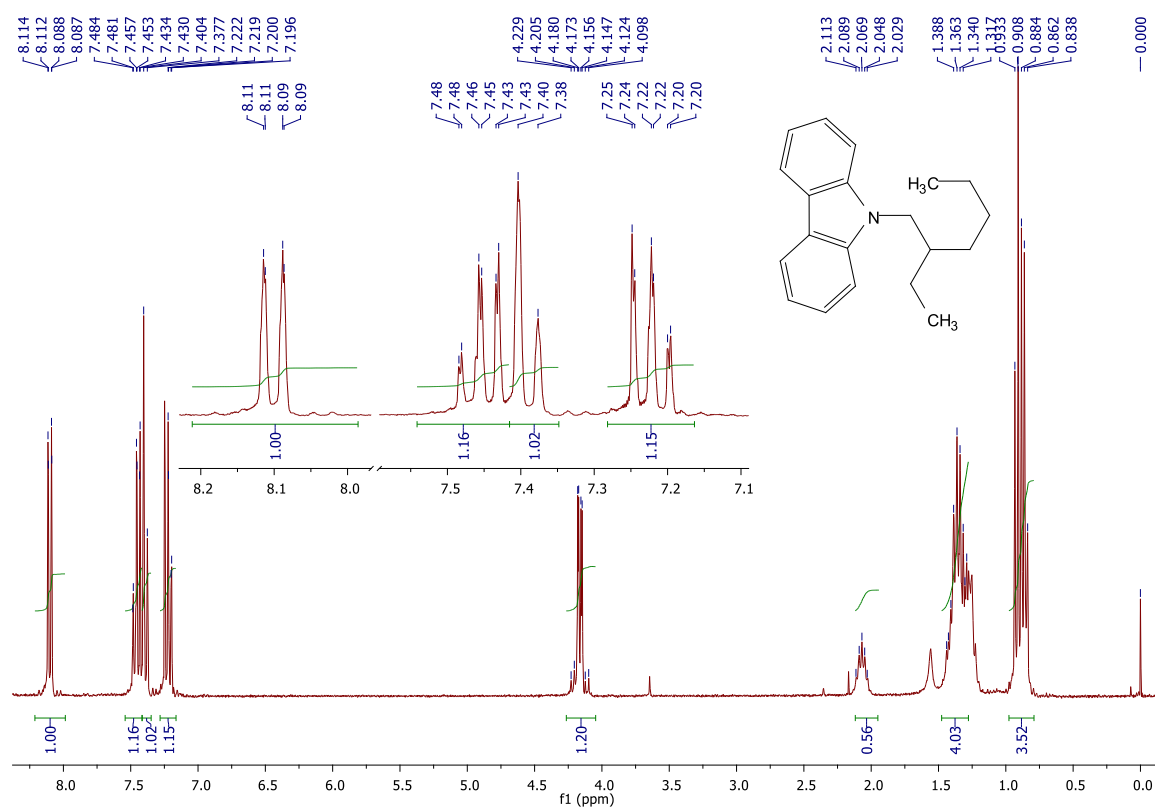

Figure S1. <sup>1</sup>H-NMR of compound **2** in CDCl<sub>3</sub>

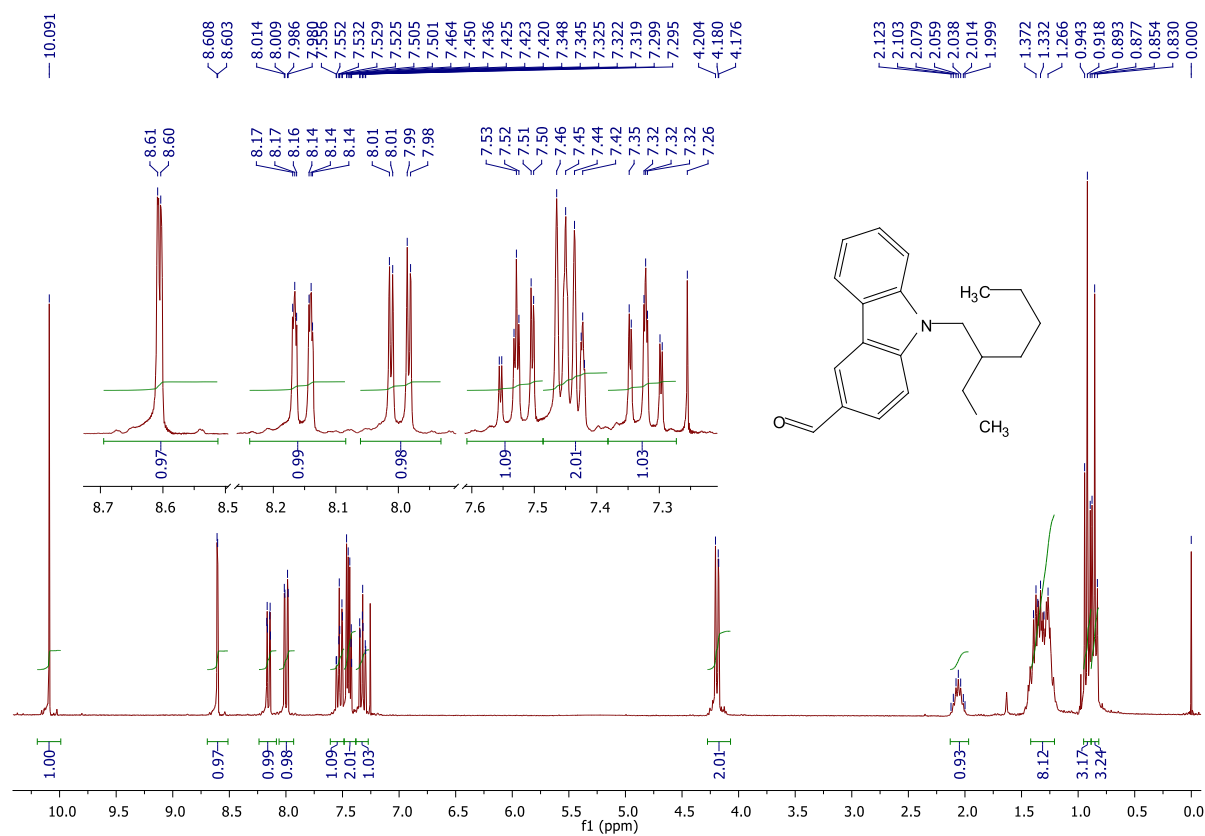

Figure S2. <sup>1</sup>H-NMR of compound **3** in CDCl<sub>3</sub>

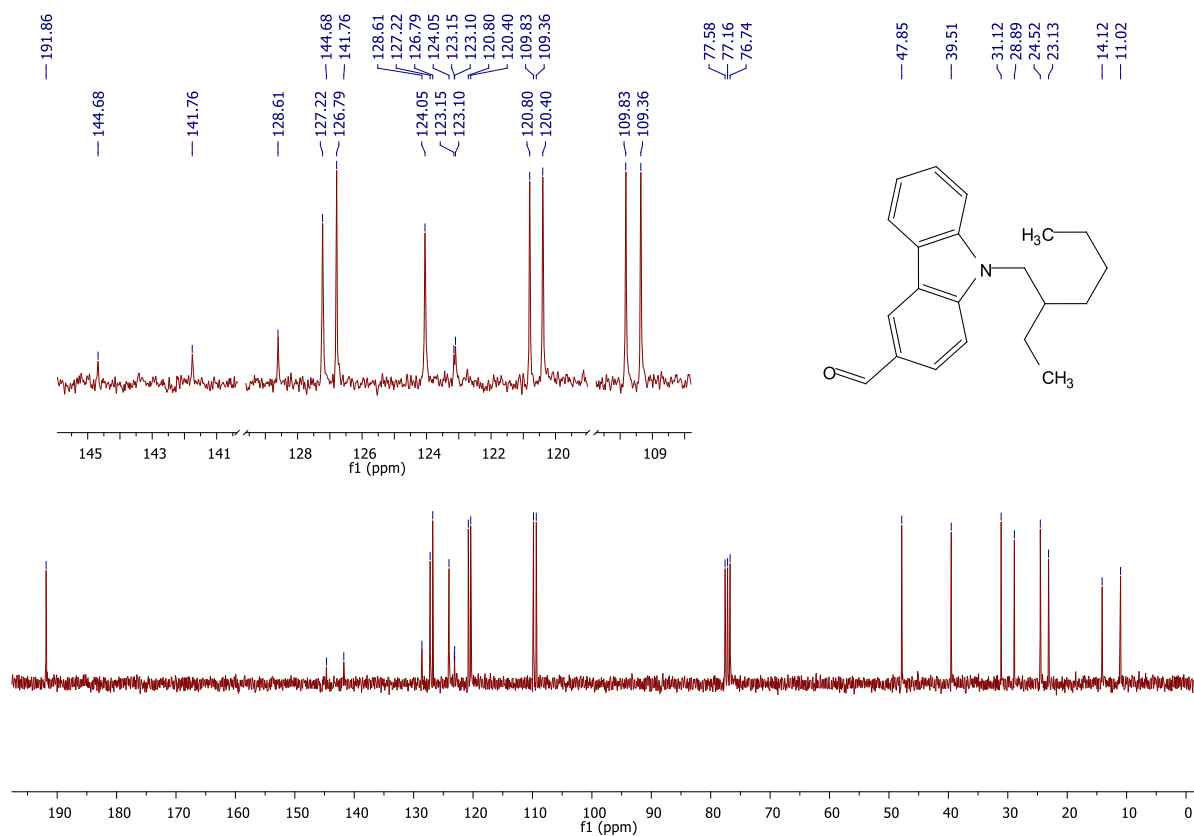

**Figure S3.**  $^{13}\text{C-NMR}$  of compound **3** in  $\text{CDCl}_3$

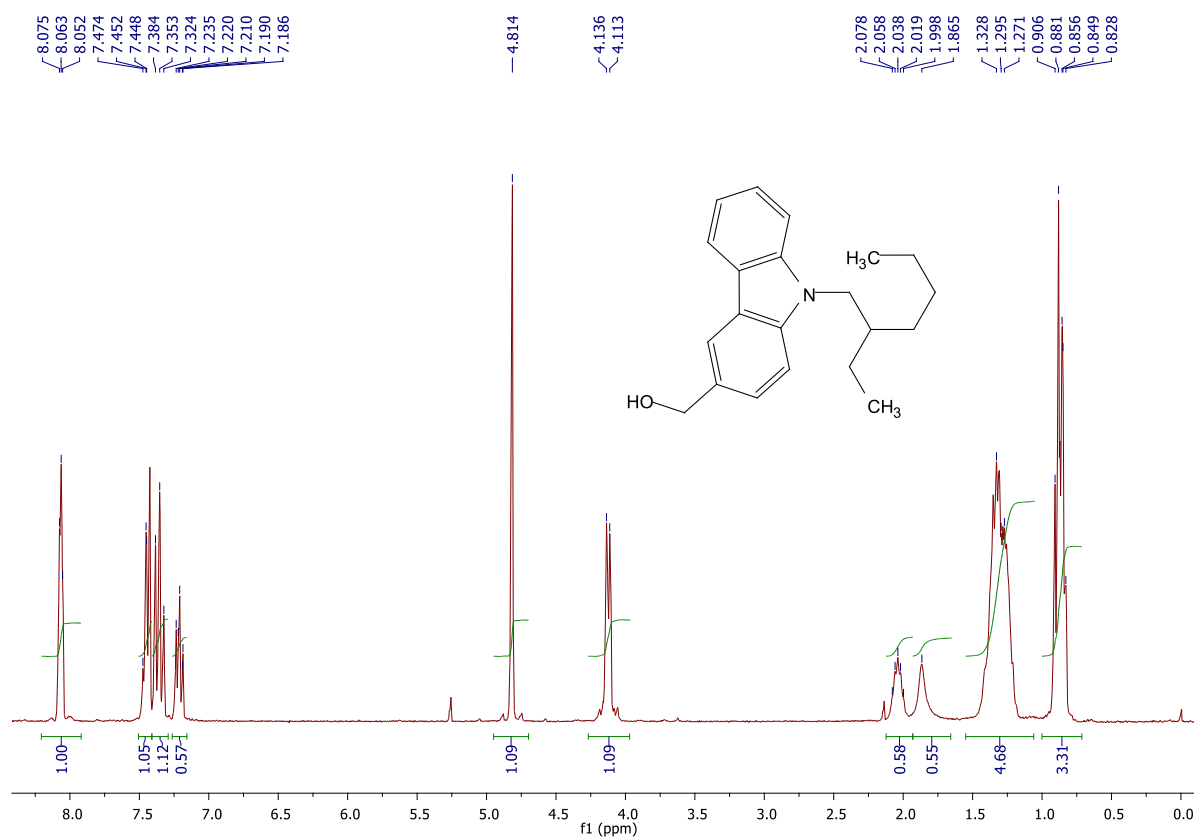

**Figure S4.**  $^1\text{H-NMR}$  of compound **4** in  $\text{CDCl}_3$

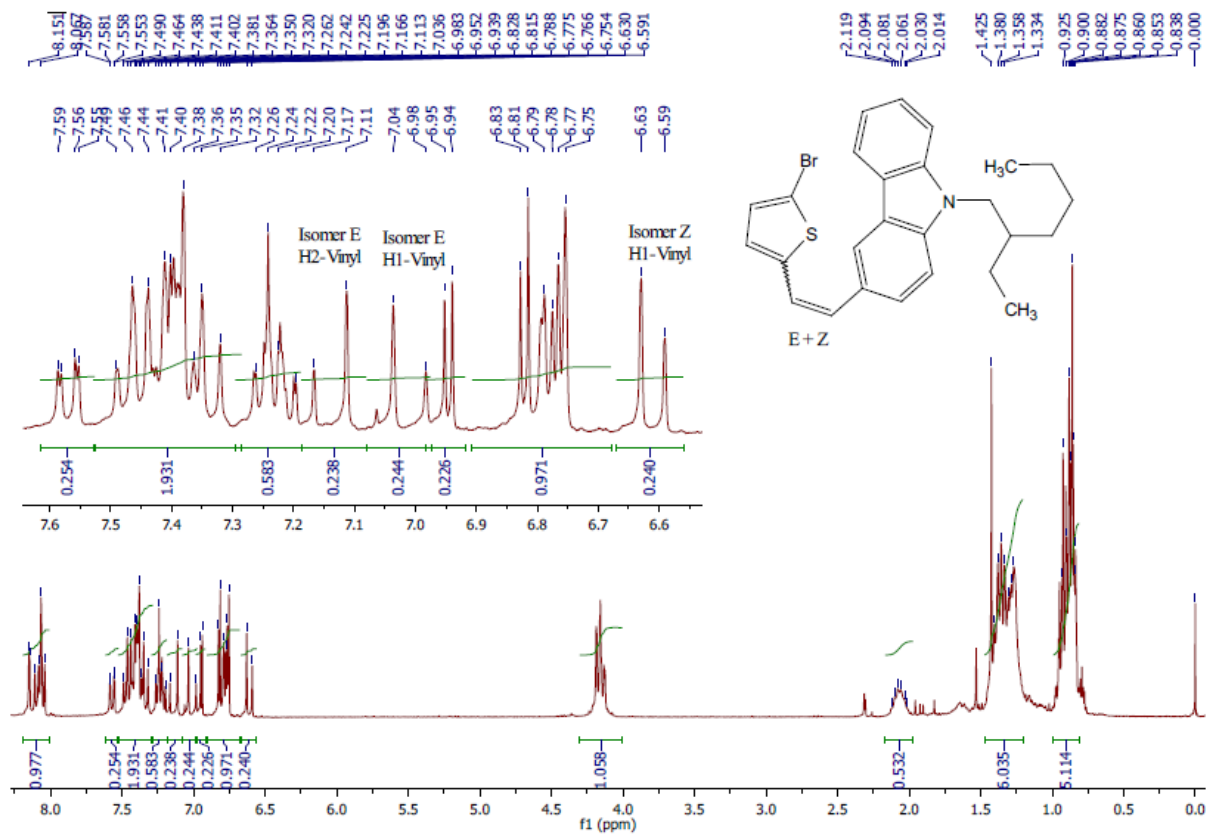

Figure S5.  $^1\text{H-NMR}$  of mixture of compounds **6** in  $\text{CDCl}_3$

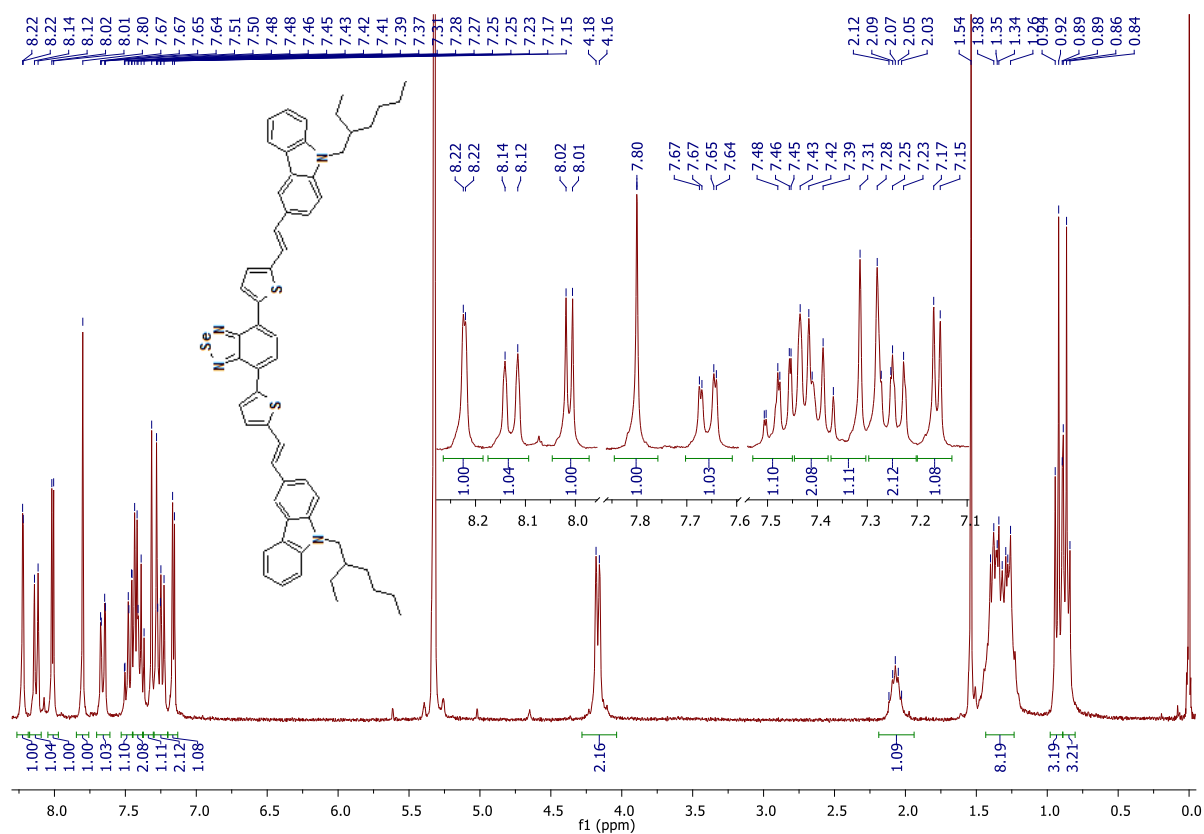

Figure S6.  $^1\text{H-NMR}$  of compound **C4** in  $\text{CD}_2\text{Cl}_2$

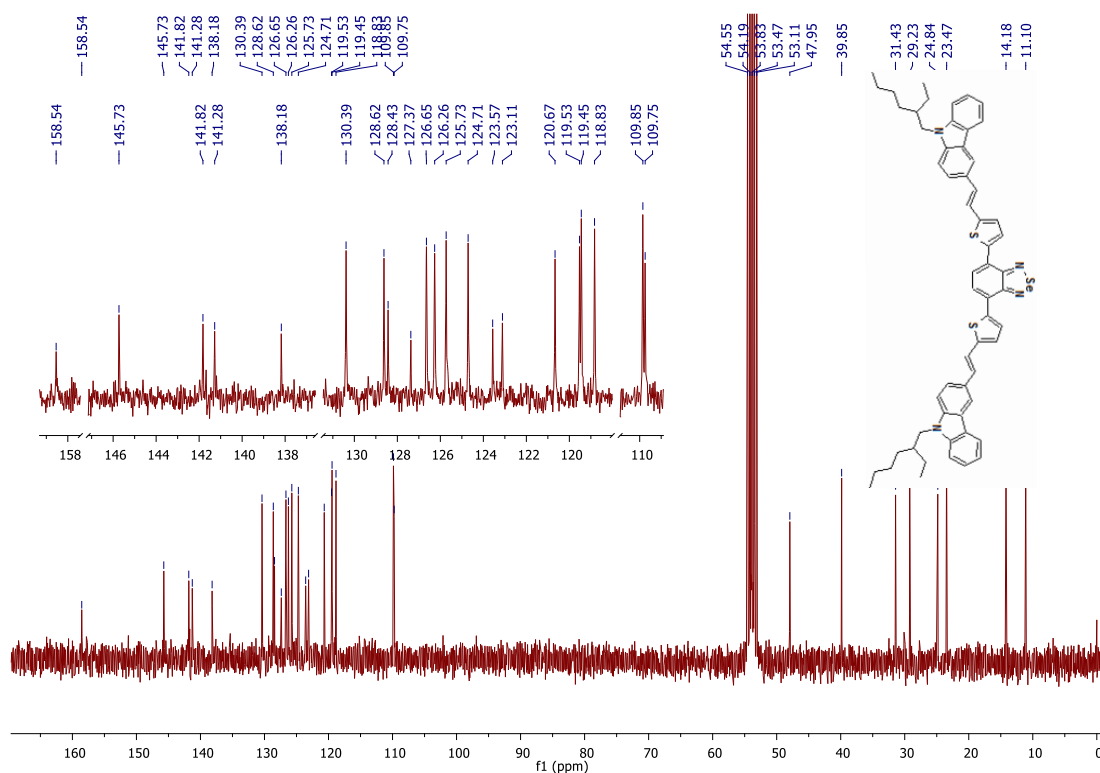

Figure 7.  $^{13}\text{C-NMR}$  of compound **C4** in  $\text{CD}_2\text{Cl}_2$

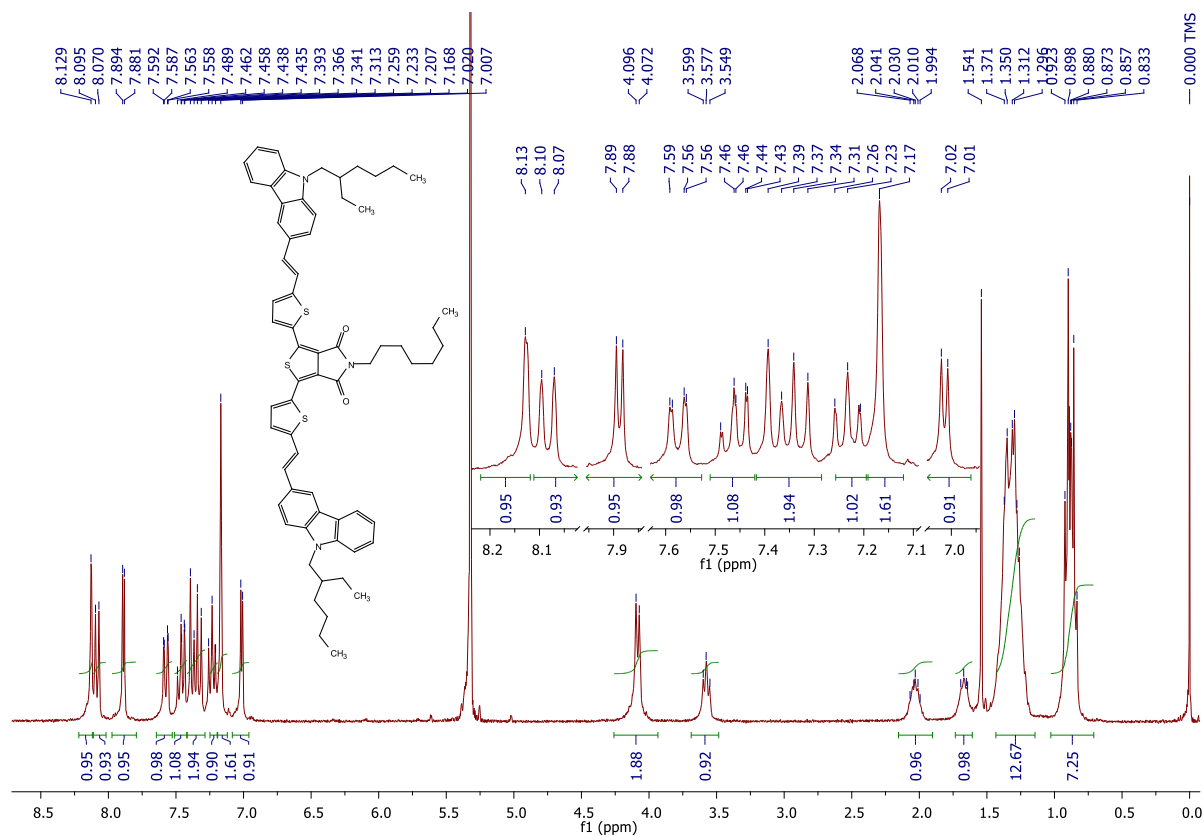

**Figure S8. <sup>1</sup>H-NMR of compound C1 in CD<sub>2</sub>Cl<sub>2</sub>**

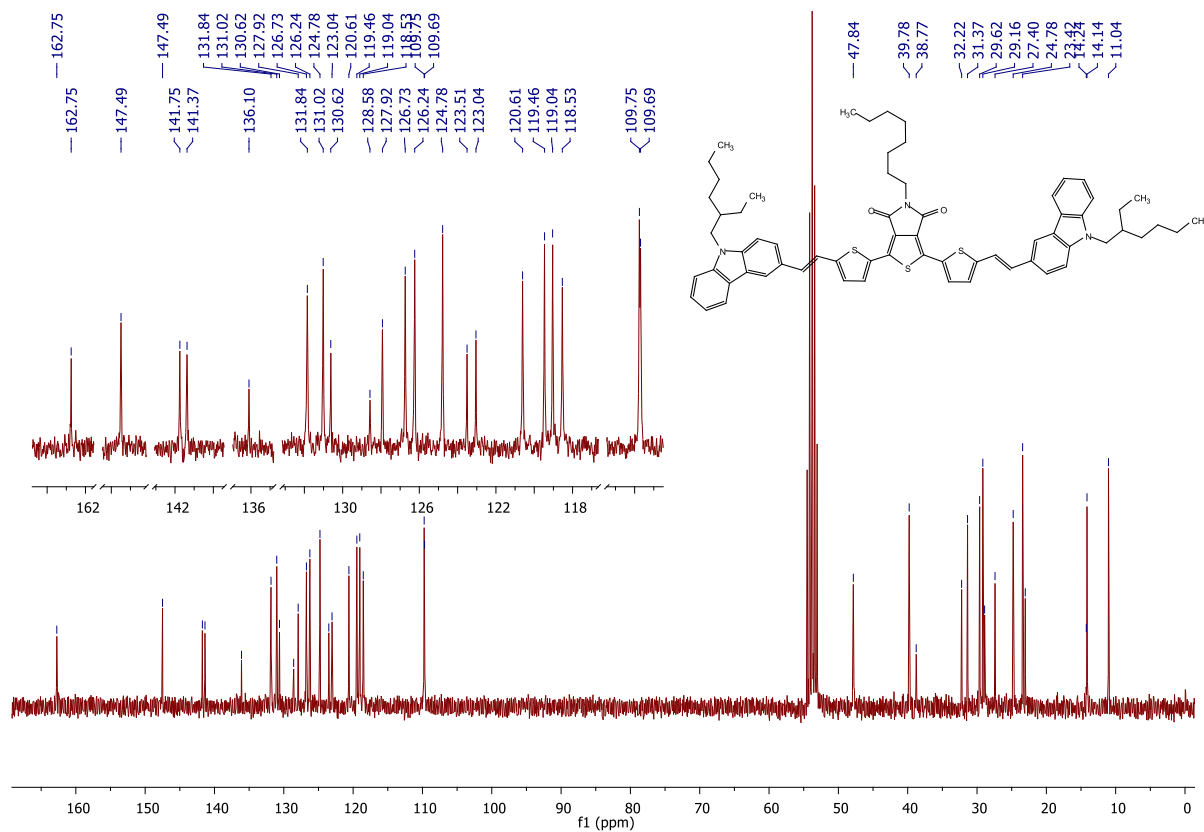

**Figure S9. <sup>13</sup>C-NMR of compound C1 in CD<sub>2</sub>Cl<sub>2</sub>**



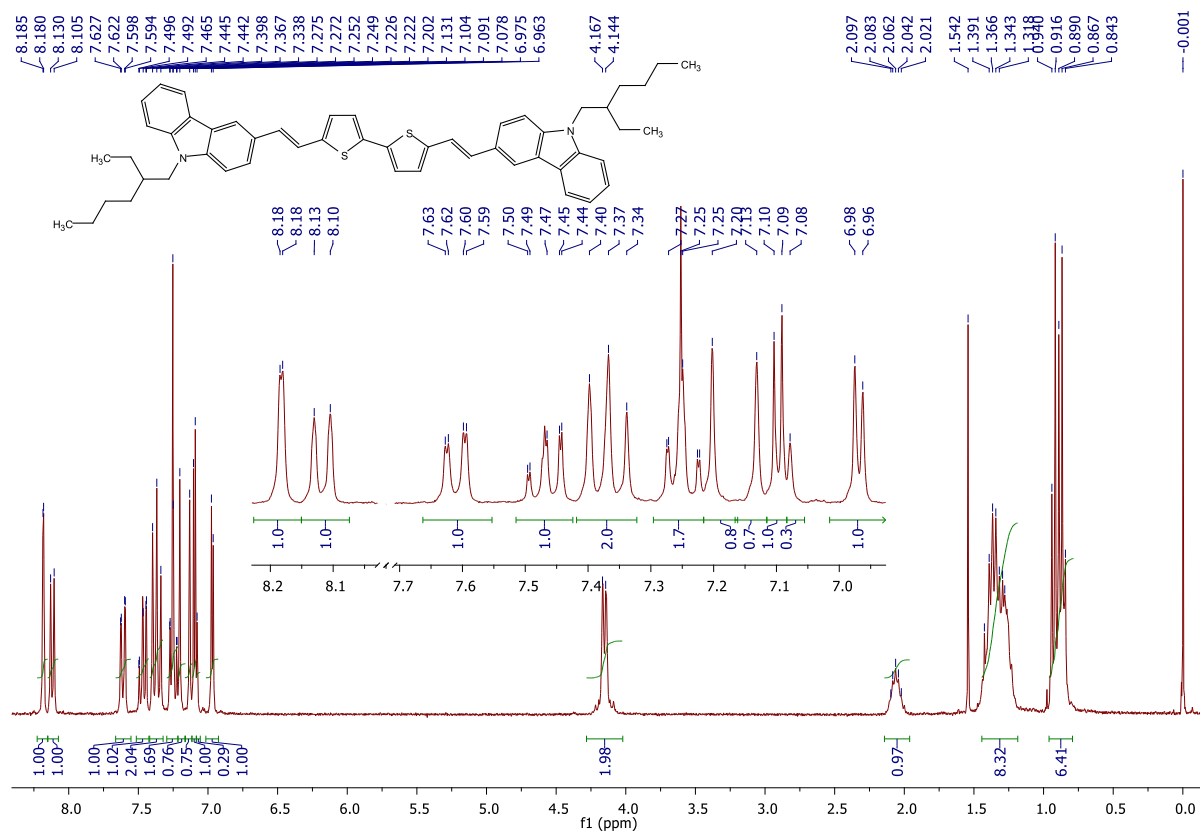

**Figure S12. <sup>1</sup>H-NMR of compound C5 in CDCl<sub>3</sub>**

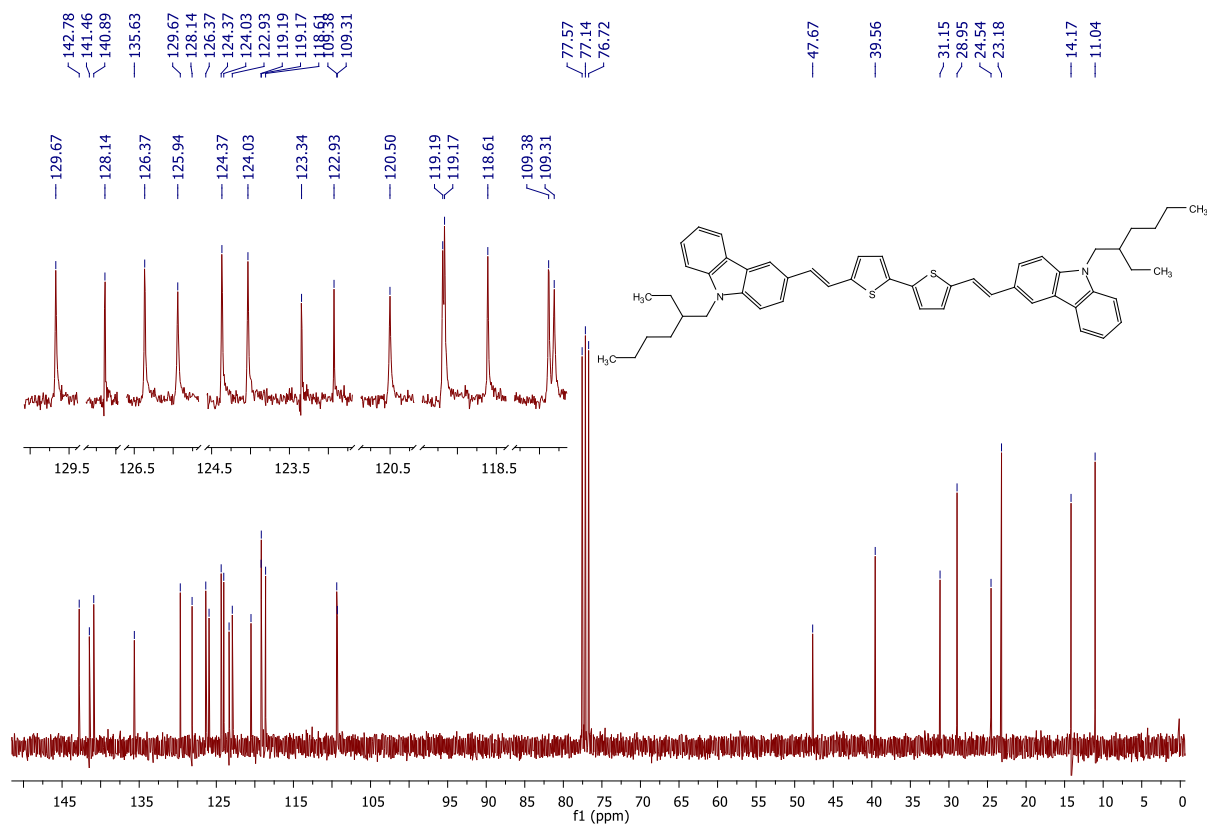

**Figure S13. <sup>13</sup>C-NMR of compound C5 in CDCl<sub>3</sub>**



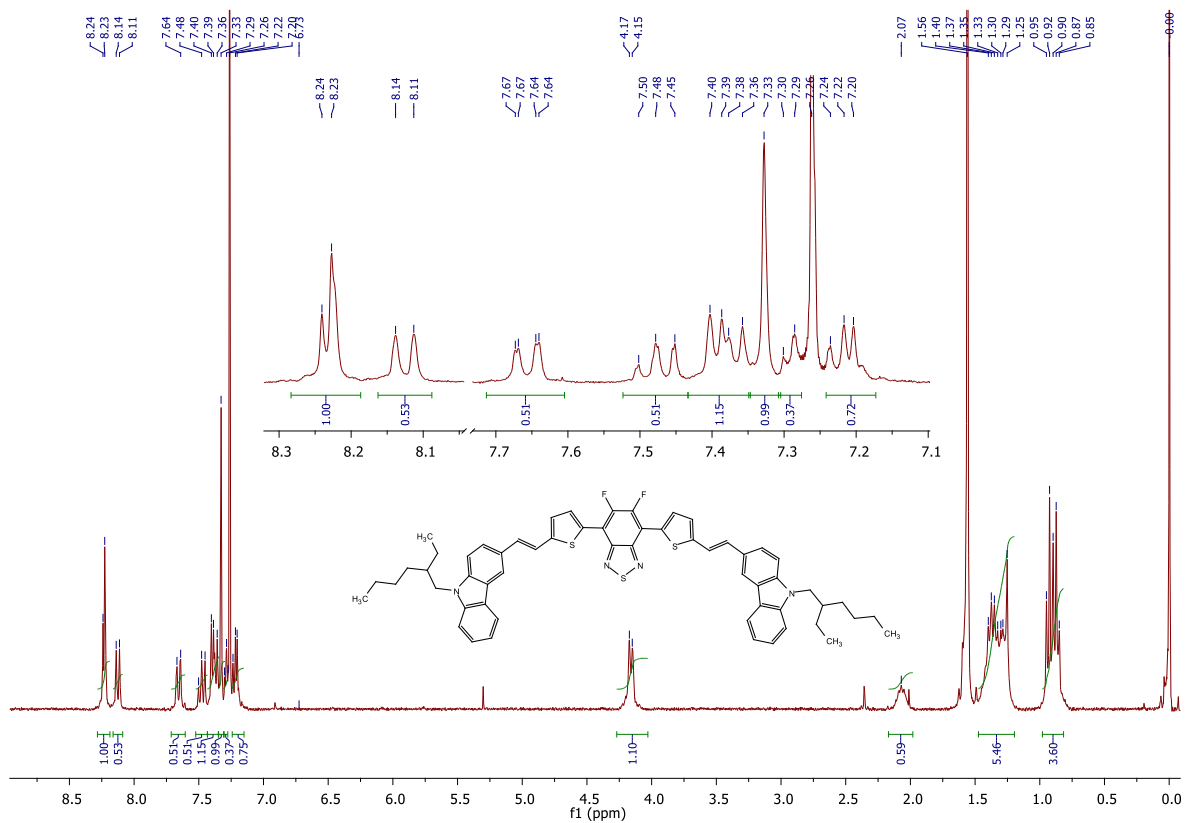

Figure S14. <sup>1</sup>H-NMR of compound C3 in CDCl<sub>3</sub>

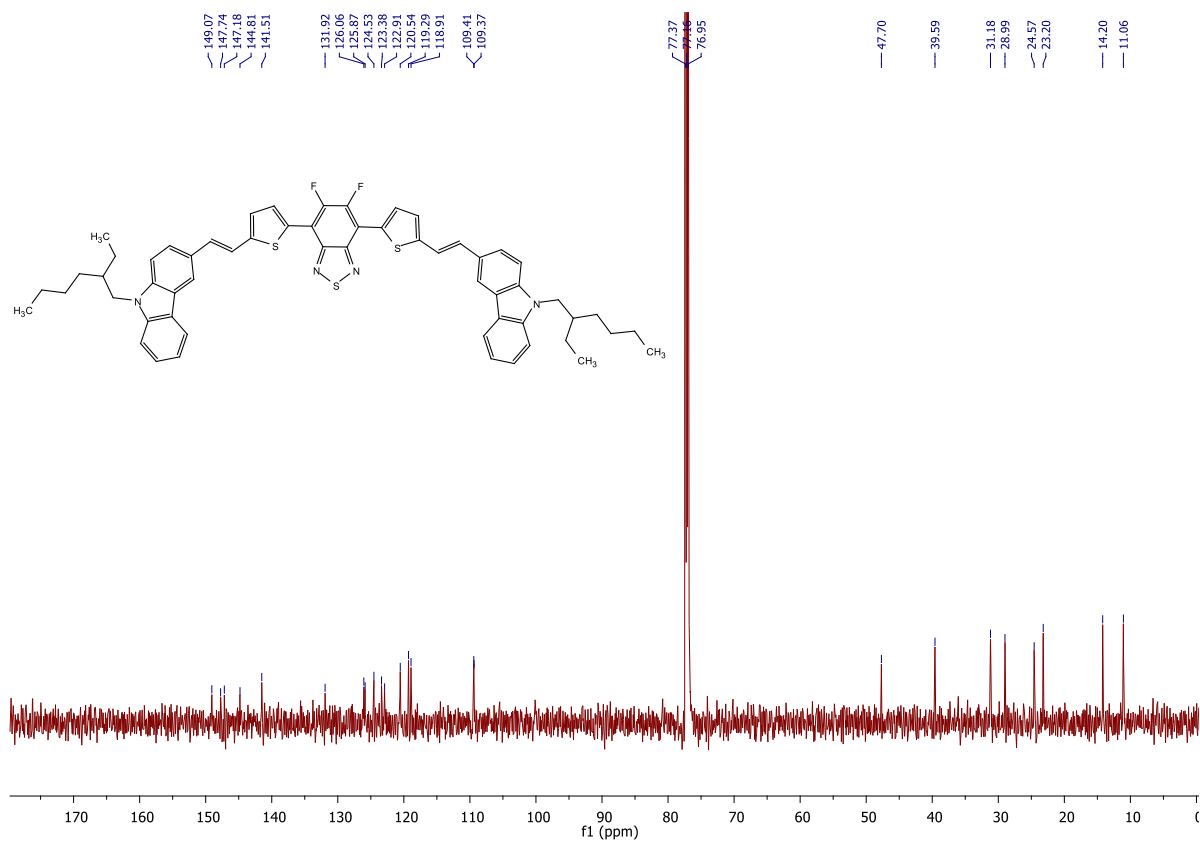

Figure S15. <sup>13</sup>C-NMR of compound C3 in CDCl<sub>3</sub>

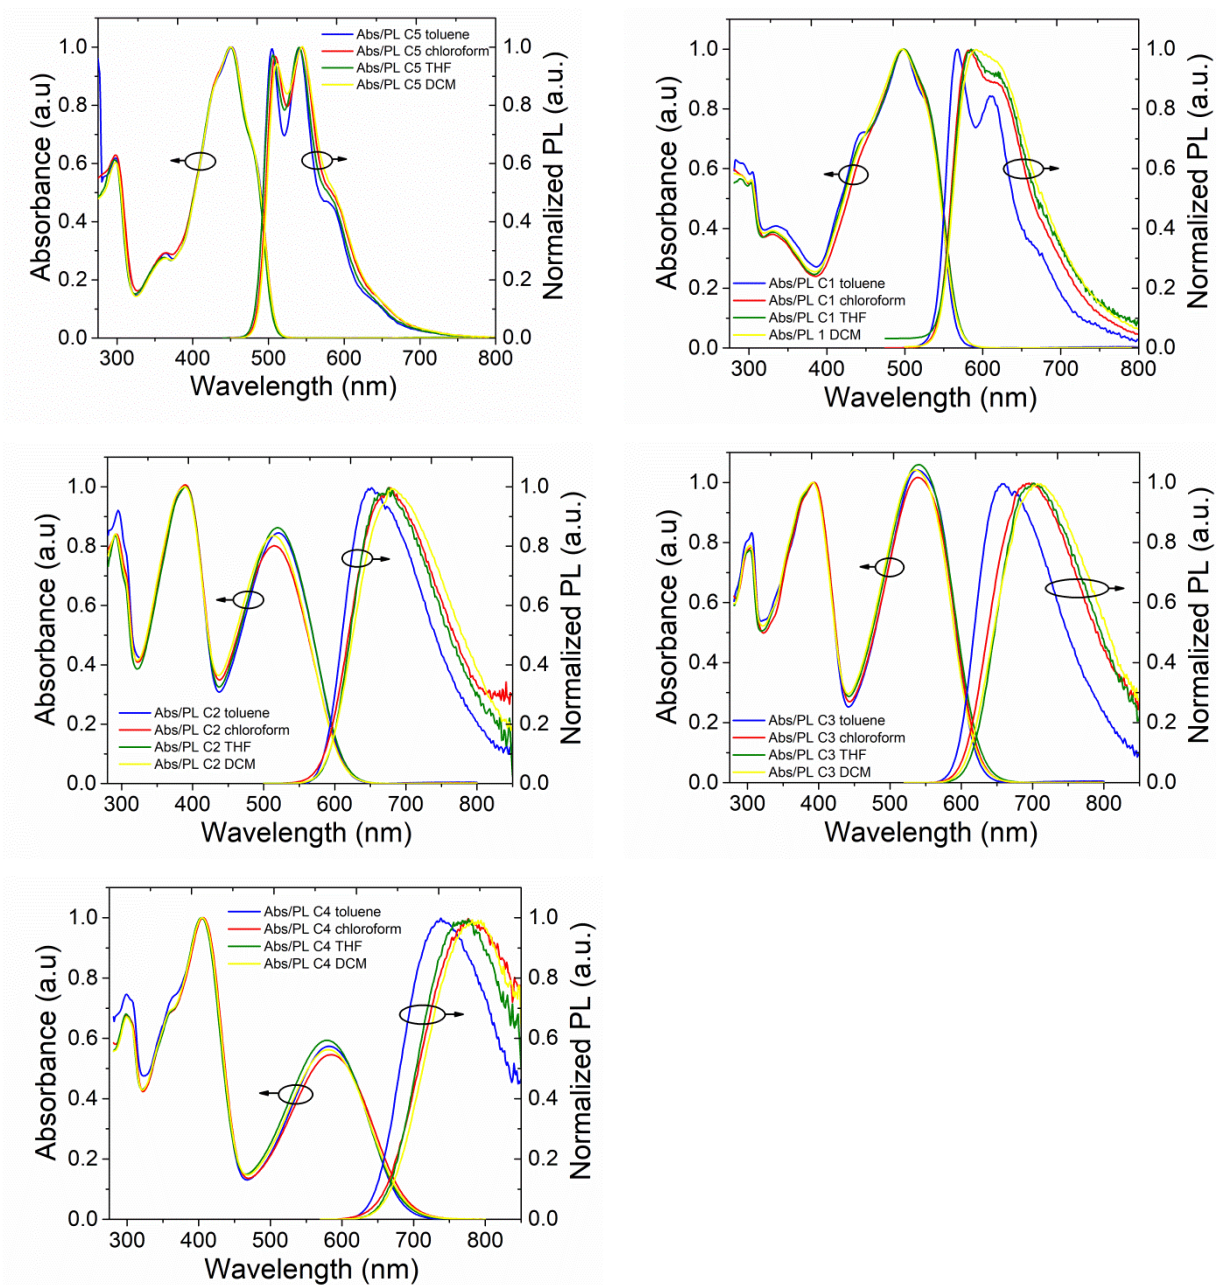

**Figure S16.** UV-Vis and photoluminescence spectra spectra of studied compounds, measured in different solvents.

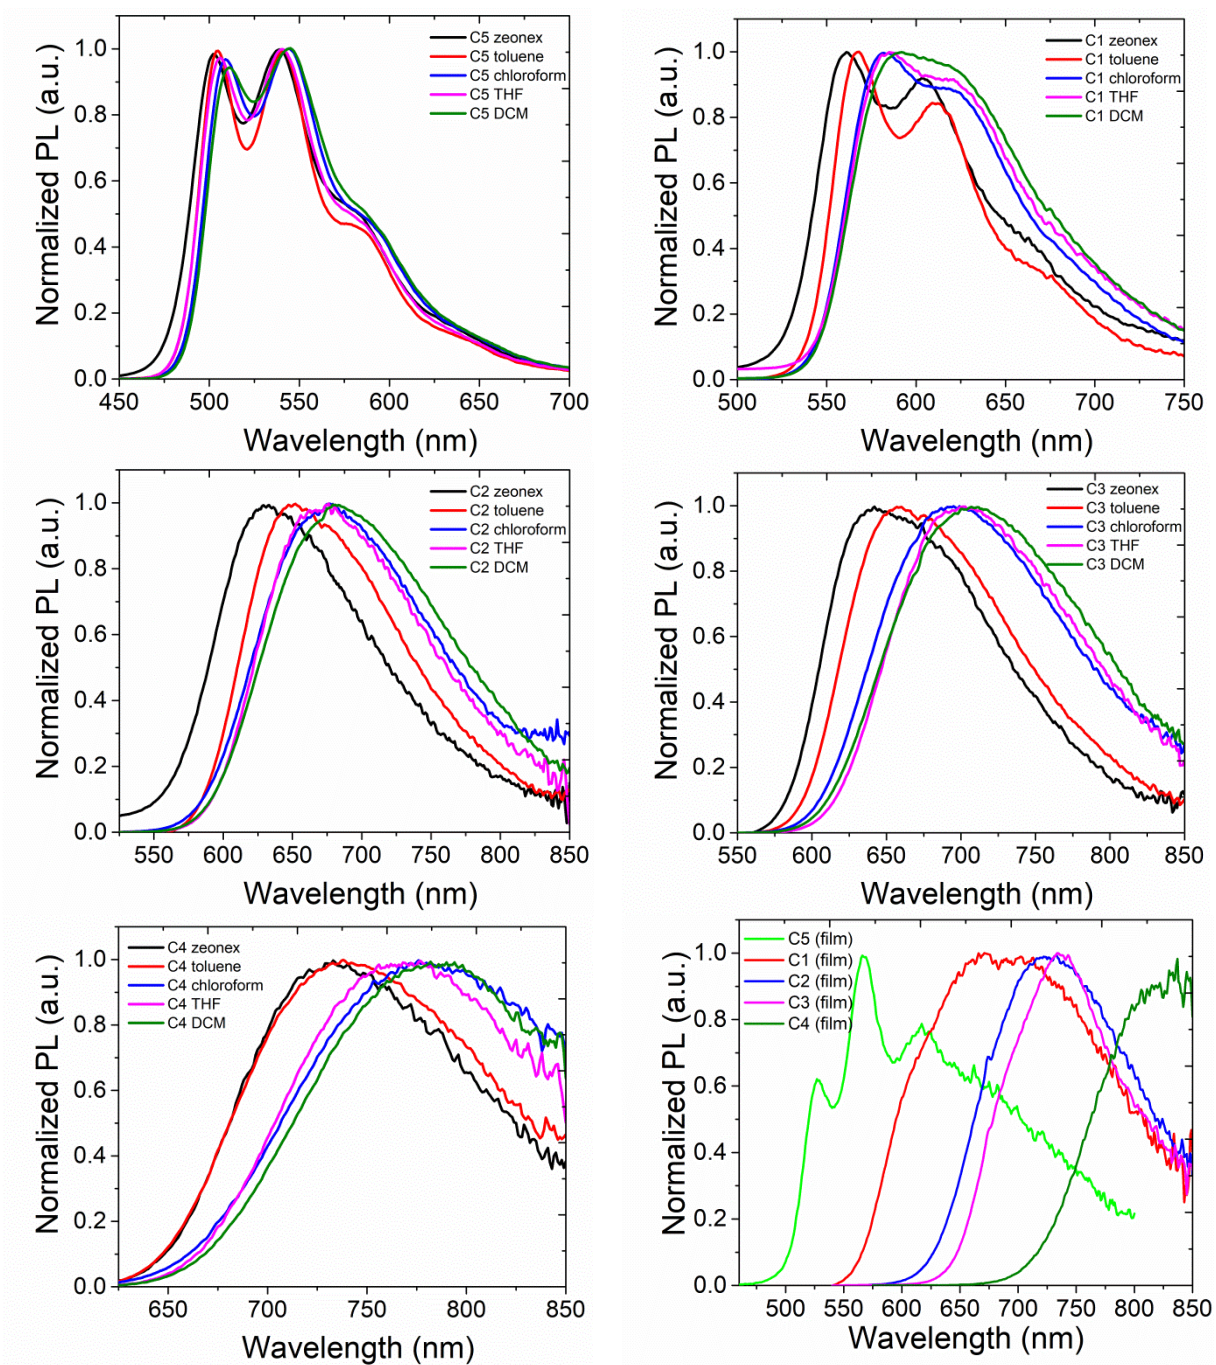

**Figure S17.** Photoluminescence spectra of emitters in the different solvents, 1 wt% in zeonex matrix and in pristine films.

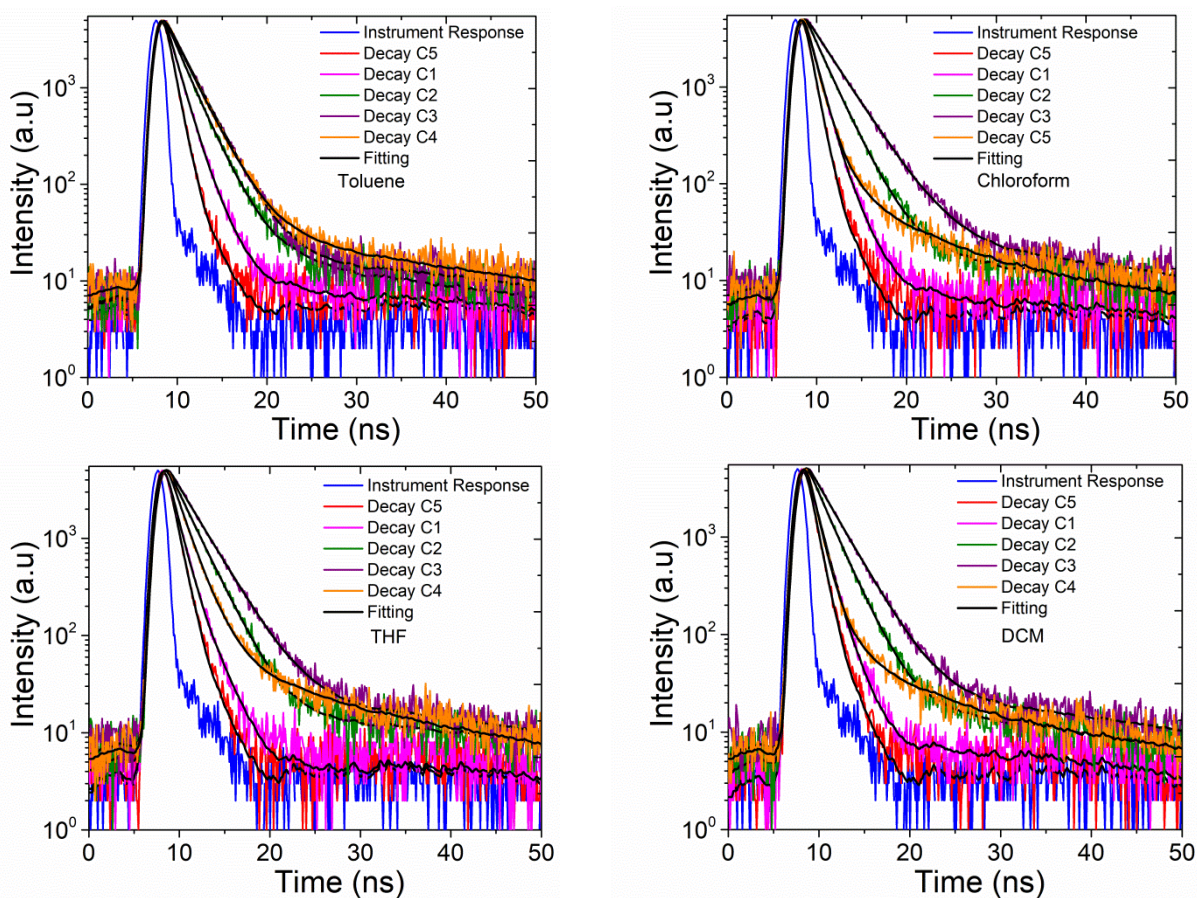

**Figure S18.** Photoluminescence decay curves of studied compounds in the different solutions ( $10^{-5}$  M in toluene, chloroform, THF, DCM) at the maximum emission.

**Table S1.** The fluorescence lifetime of the red emitters in diluted solutions obtained from photoluminescence decay curves at the maximum emission

|    | Toluene         |                 |          | Chloroform      |                 |          | THF             |                 |          | DCM             |                 |          |
|----|-----------------|-----------------|----------|-----------------|-----------------|----------|-----------------|-----------------|----------|-----------------|-----------------|----------|
|    | $\tau_1$ ns (%) | $\tau_2$ ns (%) | $\chi^2$ | $\tau_1$ ns (%) | $\tau_2$ ns (%) | $\chi^2$ | $\tau_1$ ns (%) | $\tau_2$ ns (%) | $\chi^2$ | $\tau_1$ ns (%) | $\tau_2$ ns (%) | $\chi^2$ |
| C5 | 0.9(100)        | -               | 1.28     | 0.8(100)        | -               | 1.42     | 0.9(100)        | -               | 1.32     | 0.9             | -               | 1.36     |
| C1 | 1.3 (97)        | 6.1 (3)         | 1.28     | 1.2 (98)        | 5.7 (2)         | 1.29     | 1.1 (91)        | 2.3 (9)         | 1.52     | 1.1 (98)        | 14.9 (2)        | 1.25     |
| C2 | 1.9 (95)        | 8.3 (5)         | 1.29     | 2.1 (96)        | 9.8 (4)         | 1.21     | 2.1 (97)        | 18.5 (3)        | 1.33     | 1.9 (97)        | 13.8 (3)        | 1.29     |
| C3 | 2.3 (97)        | 16.6 (3)        | 1.28     | 2.9 (96)        | 14.2 (4)        | 1.28     | 2.7 (97)        | 15.7 (3)        | 1.28     | 2.5 (97)        | 16.2 (3)        | 1.21     |
| C4 | 2.2 (95)        | 11.2 (5)        | 1.14     | 1.1 (91)        | 8.2 (9)         | 1.48     | 1.5 (93)        | 9.7 (7)         | 1.27     | 1.0 (92)        | 8.6 (8)         | 1.27     |

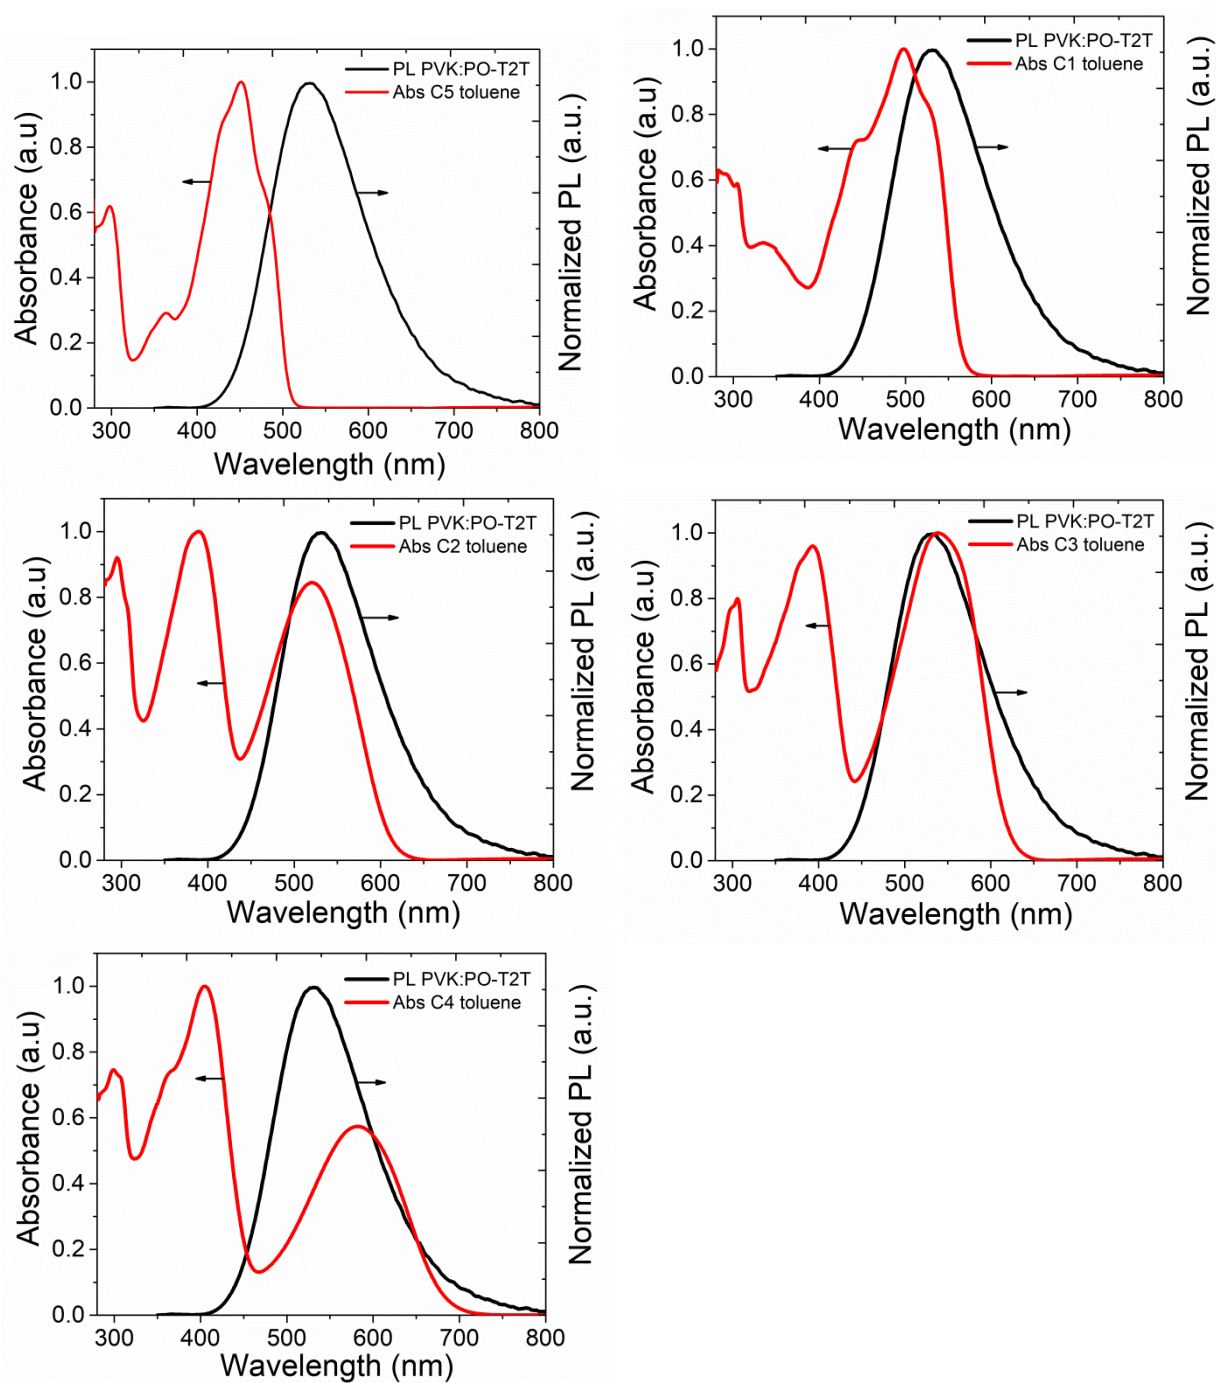

**Figure S19.** Normalized absorption spectra of the emitters in toluene solution and photoluminescence spectrum of PVK:PO-T2T in film.

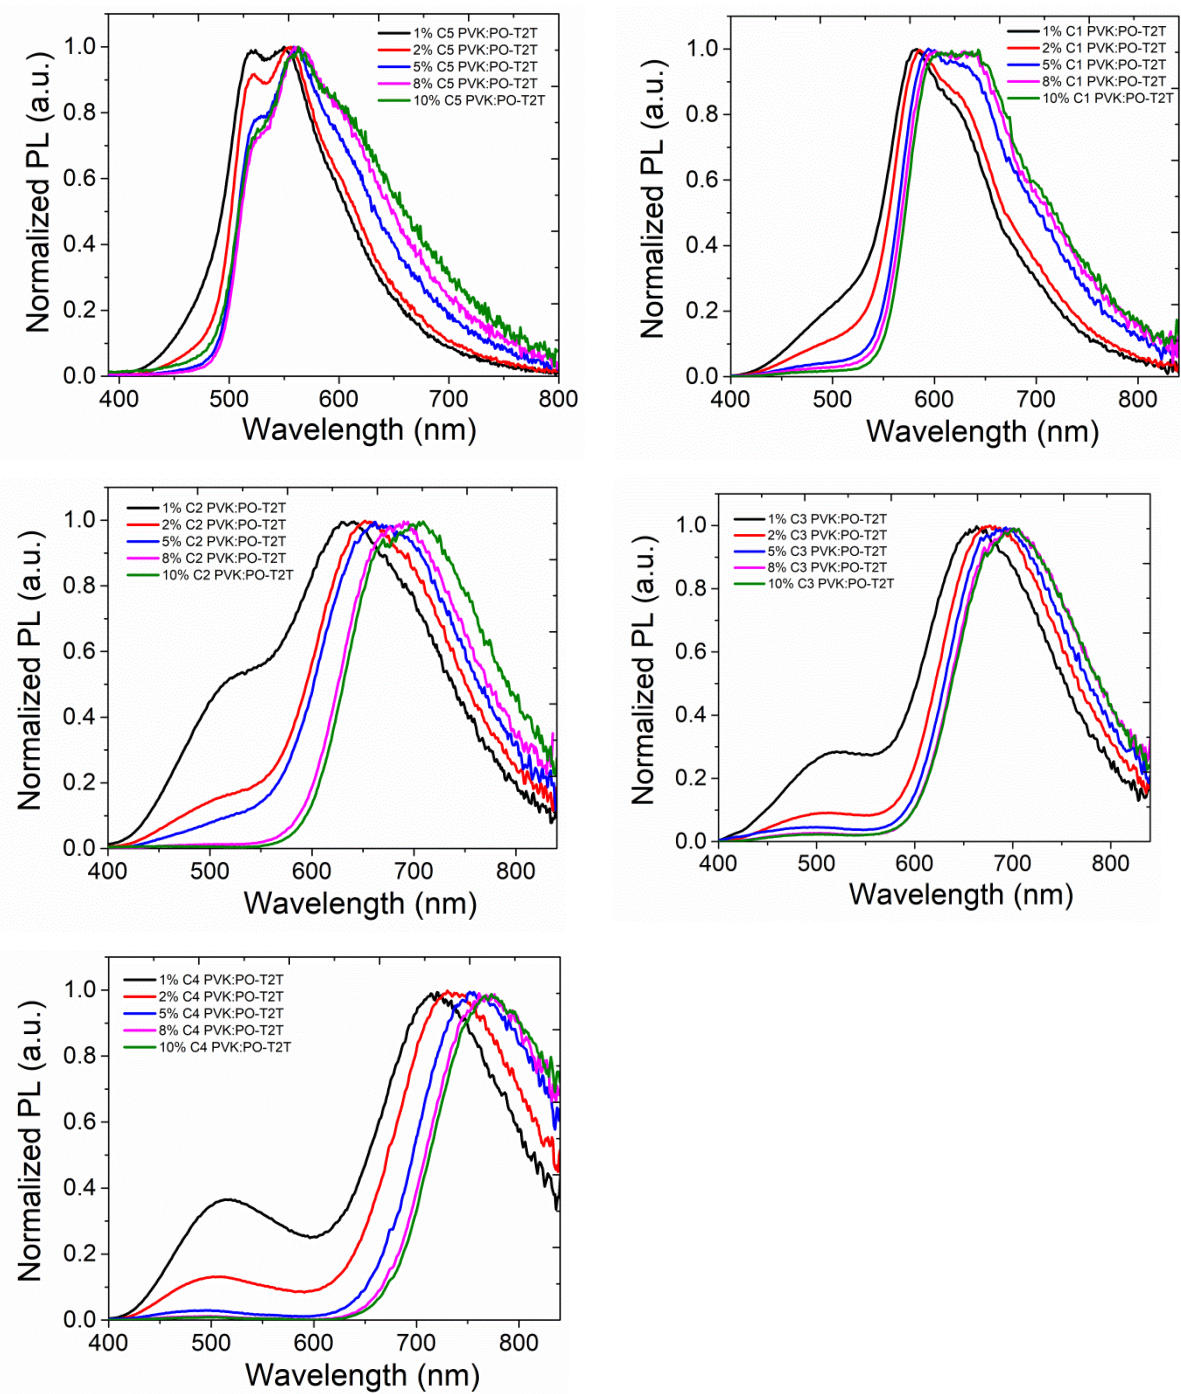

**Figure S20.** Normalized photoluminescence spectra of thin layers: PVK:PO-T2T doped with 1, 2, 5, 8, 10 wt% of studied molecules.
